# Supplementary material for: A Novel Microfluidic Strategy for Efficient Exosome Separation via Thermally Oxidized Non-Uniform Deterministic Lateral Displacement (DLD) Arrays and Dielectrophoresis (DEP) Synergy
Source: MDPI journal article supplement (doi:10.3390/bios14040174), 2024-04-04
Supplement: s1 [file s1]

Supporting Materials

# A Novel Microfluidic Strategy for Efficient Exosome Separation via Thermally Oxidized Non-Uniform Deterministic Lateral Displacement (DLD) Arrays and Dielectrophoresis (DEP) Synergy

Dayin Wang <sup>1,2,3</sup>, Shijia Yang <sup>1,2</sup>, Ning Wang <sup>1,2,3</sup>, Han Guo <sup>1,2</sup>, Shilun Feng <sup>1,2</sup>, Yuan Luo <sup>1,2,\*</sup> and Jianlong Zhao <sup>1,2,3,\*</sup>

<sup>1</sup> State Key Laboratory of Transducer Technology, Shanghai Institute of Microsystem and Information Technology, Chinese Academy of Sciences, Shanghai 200050, China; dywang@mail.sim.ac.cn (D.W.)

<sup>2</sup> Center of Materials Science and Optoelectronics Engineering, University of Chinese Academy of Sciences, Beijing 100049, China

<sup>3</sup> School of Information Science and Technology, ShanghaiTech University, Shanghai 201210, China

\* Correspondence: yuanluo@mail.sim.ac.cn (Y.L.); jlzhao@mail.sim.ac.cn (J.Z.)

## This PDF file includes:

*Supplementary Note S1*

*Supplementary Figures S1 to S3*

*Supplementary Tables S1 to S2*

*Descriptions for other Supplementary Materials (movies, audio, etc.) listed below*

## Other Supplementary Materials for this manuscript include the following:

*Supplementary Movie S1*

Supplementary Note-S1

We provide a supplementary video from a typical ongoing DLD experiment, which showcases the real-time fluorescent trajectories of 600nm particles within the DLD exosome separation chip. This serves as a supplementary visual aid to the static fluorescence images presented in the main text.

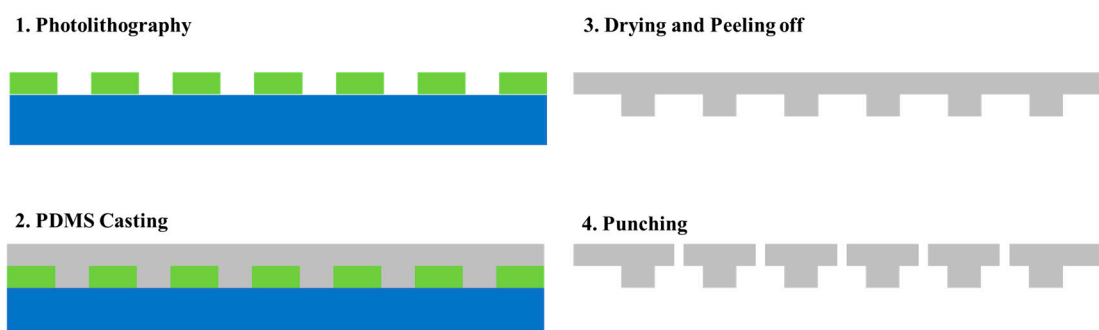

**Figure S1.** The process flow of the PDMS fabrication.

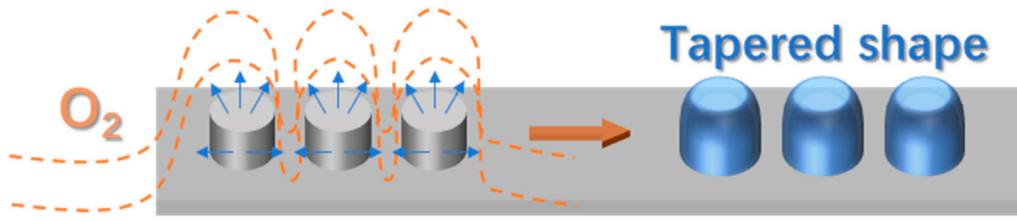

**Figure S2.** Illustration of forming a tapered structure from the arrays with vertical sidewalls through thermal oxidation.

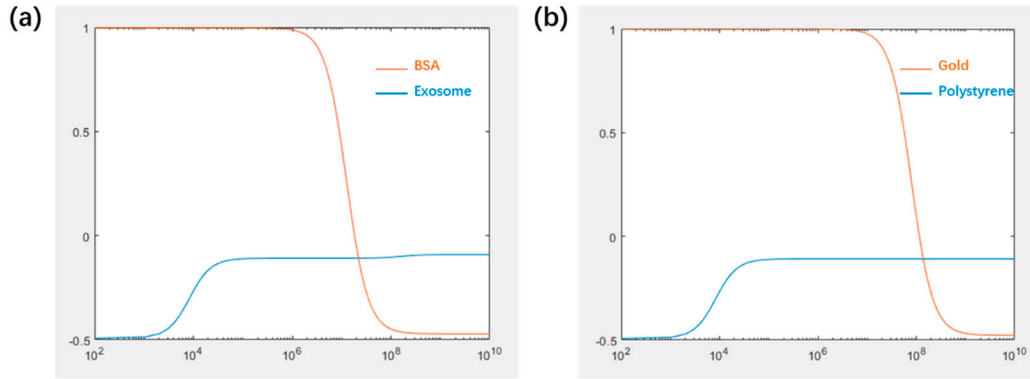

**Figure S3.** (a) The  $Re[f_{CM}]$  function for BSA & exosomes; (b) The  $Re[f_{CM}]$  function for gold nanoparticles & polystyrene nanoparticles.

**Table S1.** The parameters of the silicon-on insulator wafer.

| Diameter     |                                | 4"           |                         |
|--------------|--------------------------------|--------------|-------------------------|
| Device layer |                                | Handle wafer |                         |
| Type/Dopant  | N/As                           | Type/Dopant  | N/P                     |
| Resistivity  | 0.001~0.005 $\Omega/\text{cm}$ | Resistivity  | 1~10 $\Omega/\text{cm}$ |
| Thickness    | 2±0.1 $\mu\text{m}$            | Thickness    | 300±15 $\mu\text{m}$    |
| Orientation  | <100>                          | Orientation  | <100>                   |

**Table S2.** The parameters of Deep Reactive Ion Etching (DRIE) process.

| Etch |                               |             |        |                 | Passivation |        |                 |
|------|-------------------------------|-------------|--------|-----------------|-------------|--------|-----------------|
| Line | Gas name                      | Flow (Sccm) | Tol(%) | Ramp(Sccm/Mi n) | Flow(Sccm)  | Tol(%) | Ramp(Sccm/Mi n) |
| 1    | C <sub>4</sub> F <sub>8</sub> | 0           | 50     | 0.00            | 85          | 25     | 0.00            |
| 2    | SF <sub>6</sub>               | 130         | 25     | 0.00            | 0           | 5      | 0.00            |
| 3    | O <sub>2</sub>                | 13.0        | 25     | 0.00            | 0.0         | 5      | 0.00            |
| 4    | Ar                            | 0           | 5      | 0.00            | 0           | 5      | 0.00            |
